# Supplementary material for: Syntheses, structures and luminescent properties of seven metal–organic frameworks constructed with a rigid bis(imidazole) ligand and versatile carboxylate acids
Source: Royal Society of Chemistry journal article supplement (doi:10.1039/c3ce42339e), 2013-12-05
Supplement: c3ce42339e.pdf [file c3ce42339e.pdf]

[Supporting information]

# **Syntheses, Structures and Luminescent Properties of Seven Metal-Organic Frameworks Constructed with A Rigid Imidazole Ligand and Versatile Carboxylate Acids**

**Huadong Guo<sup>a</sup>, Xianmin Guo<sup>\*a</sup>, Hengye Zou<sup>a</sup>, Yanjuan Qi<sup>a</sup> and Ruizhan Chen<sup>a</sup>**

<sup>a</sup> *Department of Chemistry, Changchun Normal University, Changchun, 130032, P. R. China.*

*Fax: +86-431-86168210; Tel: +86-431-86168210; E-mail: xian\_min@hotmail.com*

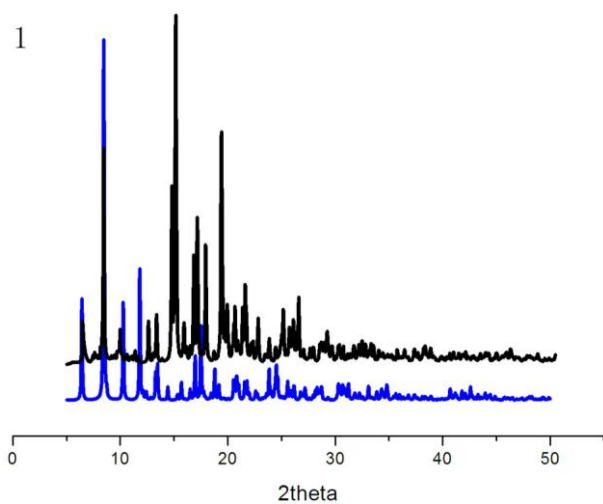

**Figure S1.** The simulated (blue) and experimental (black) XRPD patterns for **1**.

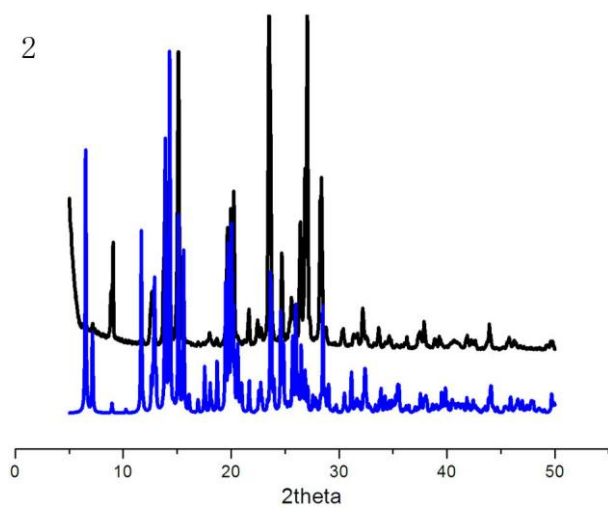

**Figure S2.** The simulated (blue) and experimental (black) XRPD patterns for **2**.

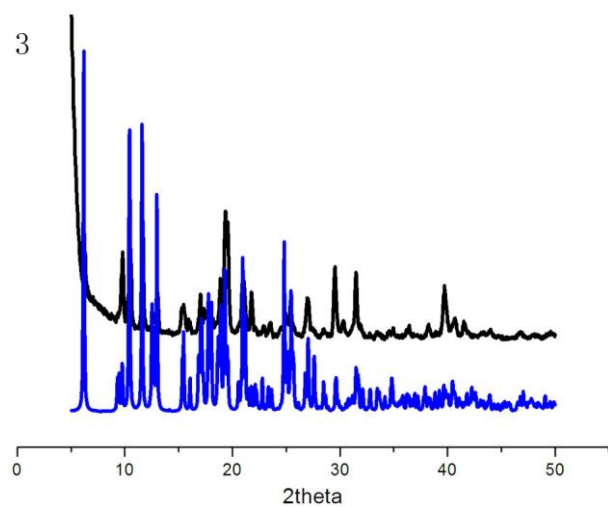

**Figure S3.** The simulated (blue) and experimental (black) XRPD patterns for **3**.

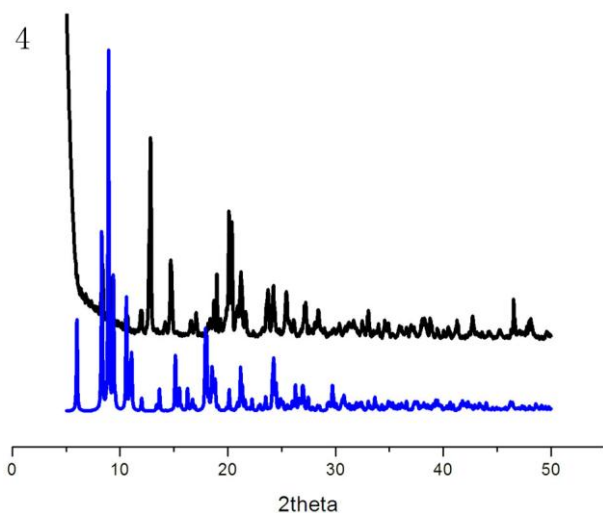

**Figure S4.** The simulated (blue) and experimental (black) XRPD patterns for **4**.

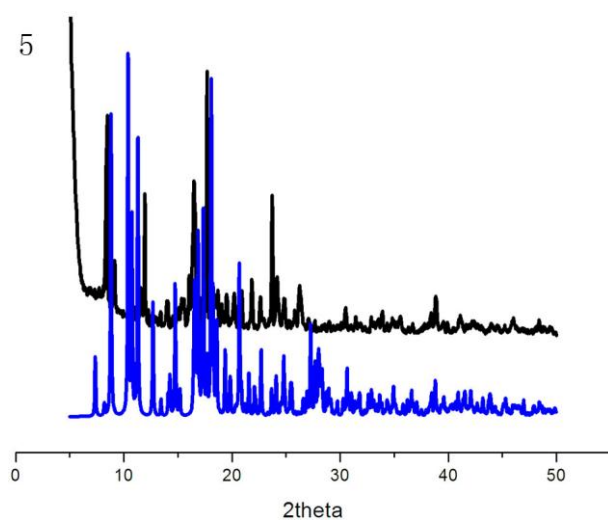

**Figure S5.** The simulated (blue) and experimental (black) XRPD patterns for **5**.

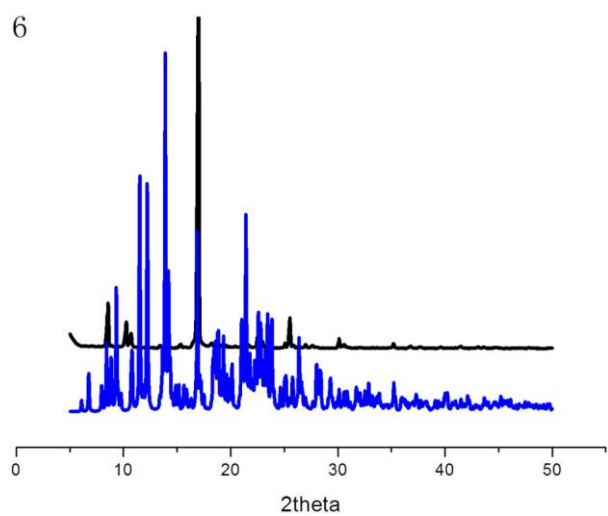

**Figure S6.** The simulated (blue) and experimental (black) XRPD patterns for **6**.

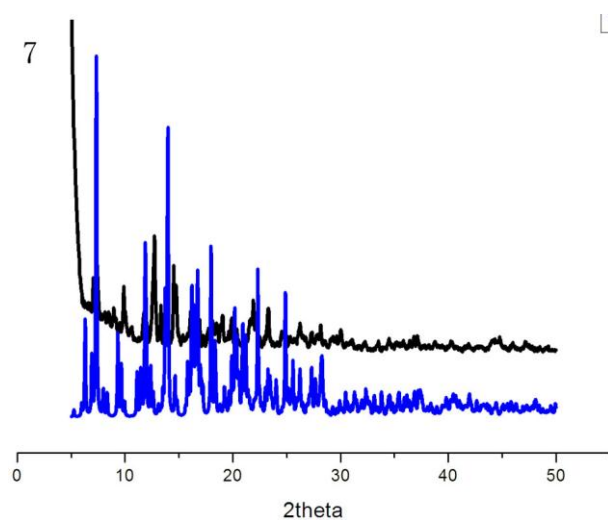

**Figure S7.** The simulated (blue) and experimental (black) XRPD patterns for **7**.

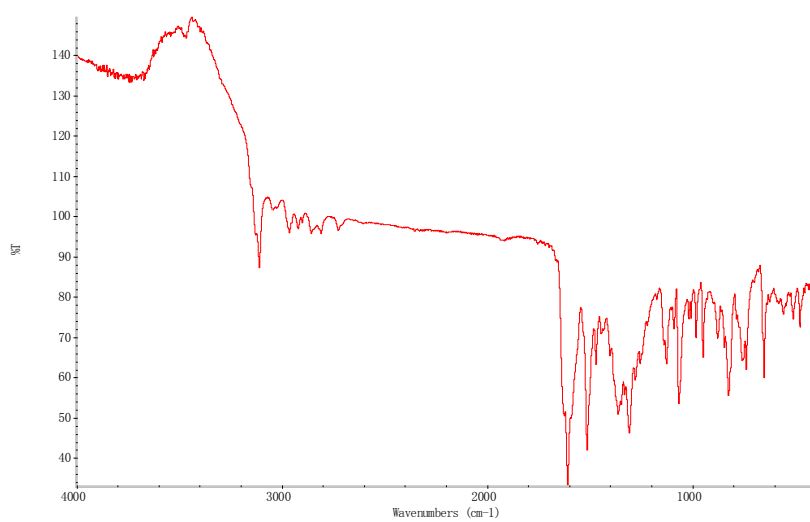

**Figure S8.** IR (4000-400 cm<sup>-1</sup>) spectrum of the compound **1**.

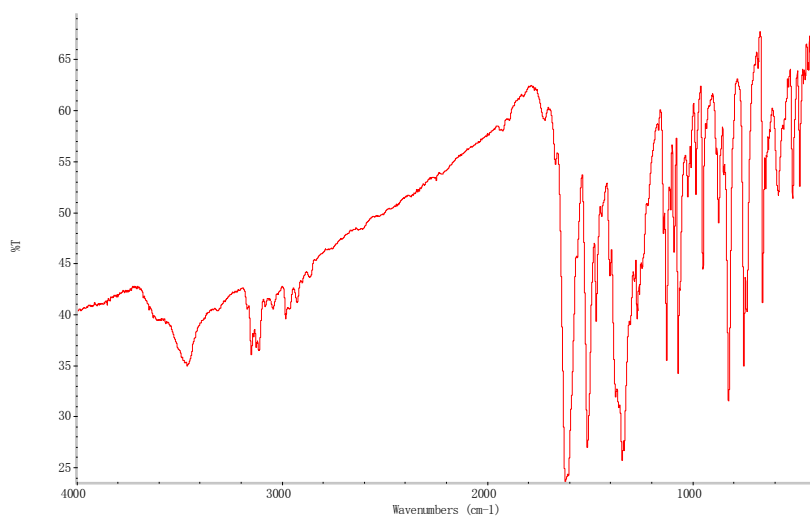

**Figure S9.** IR (4000-400 cm<sup>-1</sup>) spectrum of the compound **2**.

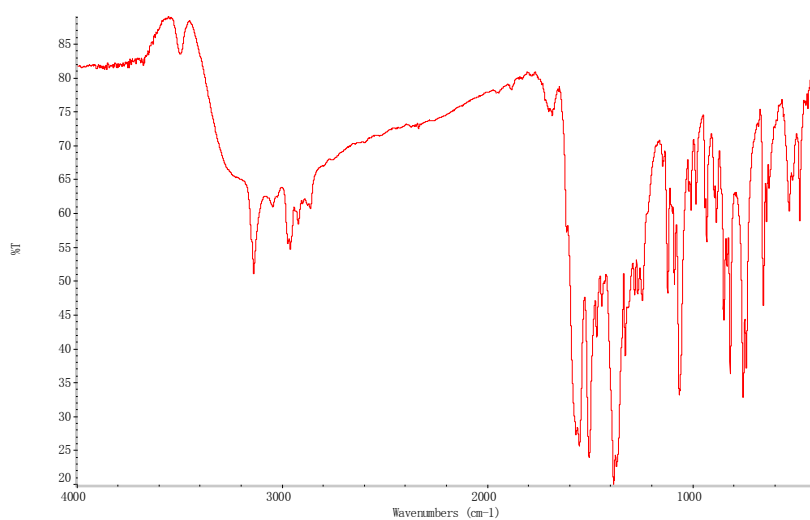

**Figure S10.** IR (4000-400 cm<sup>-1</sup>) spectrum of the compound **3**.

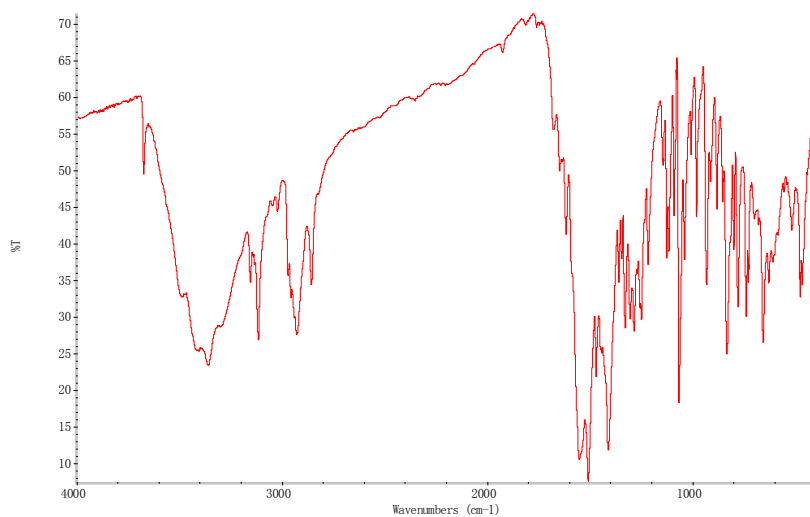

**Figure S11.** IR (4000-400 cm<sup>-1</sup>) spectrum of the compound **4**.

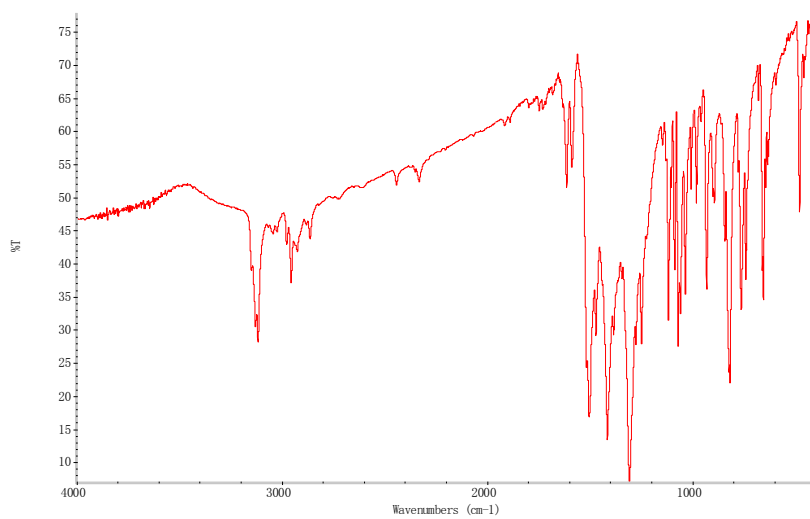

**Figure S12.** IR (4000-400 cm<sup>-1</sup>) spectrum of the compound **5**.

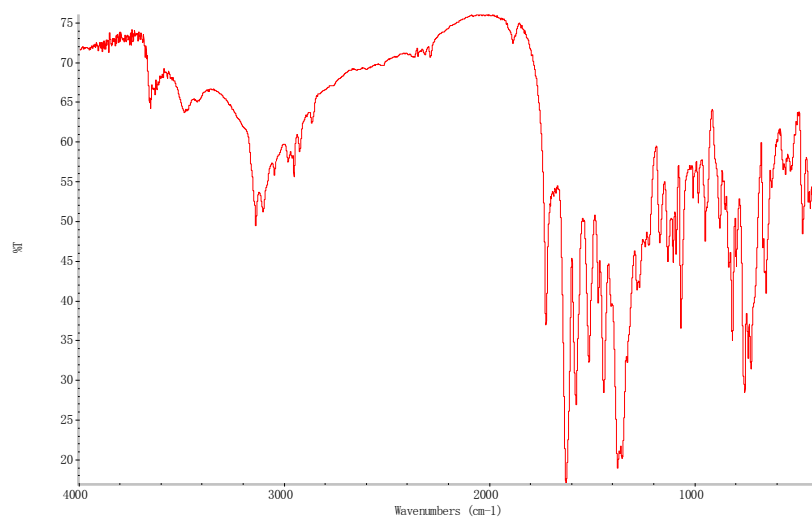

**Figure S13.** IR (4000-400  $\text{cm}^{-1}$ ) spectrum of the compound **6**.

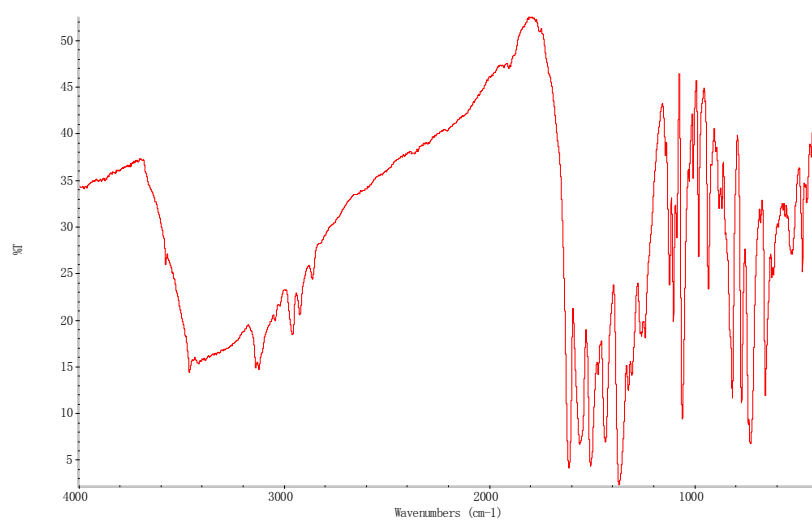

**Figure S14.** IR (4000-400  $\text{cm}^{-1}$ ) spectrum of the compound **7**.

**Table S1.** Selected bond distances ( $\text{\AA}$ ) and angles ( $^\circ$ ) for **1**.

---

|              |          |
|--------------|----------|
| Zn(1)-N(1)   | 2.025(3) |
| Zn(1)-O(1)   | 2.224(3) |
| Zn(1)-(5)    | 2.081(3) |
| Zn(1)-O(7)   | 1.947(3) |
| Zn(1)-O(9)   | 1.999(2) |
| Zn(2)-O(6)   | 2.075(2) |
| Zn(2)-O(8)   | 2.145(2) |
| Zn(2)-O(9)   | 2.081(2) |
| Zn(3)-O(2)   | 1.941(3) |
| Zn(3)#1-O(4) | 2.032(3) |

|                     |            |
|---------------------|------------|
| Zn(3)-O(9)          | 1.942(2)   |
| Zn(3)-N(4)#3        | 1.978(3)   |
| O(7)-Zn(1)-O(9)     | 119.67(11) |
| O(7)-Zn(1)-N(1)     | 117.20(12) |
| O(9)-Zn(1)-N(1)     | 122.97(11) |
| O(7)-Zn(1)-O(5)     | 92.99(12)  |
| O(9)-Zn(1)-O(5)     | 90.50(10)  |
| N(1)-Zn(1)-O(5)     | 90.53(11)  |
| O(7)-Zn(1)-O(1)     | 87.61(11)  |
| O(9)-Zn(1)-O(1)     | 93.20(9)   |
| N(1)-Zn(1)-O(1)     | 85.11(11)  |
| O(5)-Zn(1)-O(1)     | 175.37(10) |
| O(6)#2-Zn(2)-O(6)   | 180.000(1) |
| O(6)#2-Zn(2)-O(9)   | 85.43(9)   |
| O(6)-Zn(2)-O(9)     | 94.57(9)   |
| O(9)-Zn(2)-O(9)#2   | 180.000(1) |
| O(6)-Zn(2)-O(8)#2   | 90.77(10)  |
| O(6)-Zn(2)-O(8)     | 89.23(10)  |
| O(9)-Zn(2)-O(8)     | 93.97(10)  |
| O(9)#2-Zn(2)-O(8)   | 86.03(10)  |
| O(8)#2-Zn(2)-O(8)   | 180.0      |
| O(2)-Zn(3)-O(9)     | 116.86(11) |
| O(2)-Zn(3)-N(4)#3   | 108.34(12) |
| O(9)-Zn(3)-N(4)#3   | 129.20(12) |
| O(2)-Zn(3)-O(4)#4   | 99.10(12)  |
| O(9)-Zn(3)-O(4)#4   | 98.46(10)  |
| N(4)#3-Zn(3)-O(4)#4 | 96.08(12)  |

---

Symmetry transformations used to generate equivalent atoms: #1  $x+1/2, y, -z+5/2$ ; #2  $-x+2, -y, -z+2$ ; #3  $x, -y-1/2, z-1/2$ ; #4  $x-1/2, y, -z+5/2$ .

**Table S2.** Selected bond distances (Å) and angles (°) for **2**.

---

|                   |            |
|-------------------|------------|
| Zn(1)-N(1)        | 1.9919(18) |
| Zn(1)-O(2)        | 1.9543(16) |
| Zn(1)-O(4)        | 1.9557(17) |
| Zn(1)-N(4)#1      | 2.0078(19) |
| O(2)-Zn(1)-O(4)   | 107.48(7)  |
| O(2)-Zn(1)-N(1)   | 114.21(7)  |
| O(4)-Zn(1)-N(1)   | 115.74(8)  |
| O(2)-Zn(1)-N(4)#1 | 112.12(8)  |
| O(4)-Zn(1)-N(4)#1 | 94.00(7)   |
| N(1)-Zn(1)-N(4)#1 | 111.60(8)  |

---

Symmetry transformations used to generate equivalent atoms: #1  $x+1/2, y+1/2, z$ .

**Table S3.** Selected bond distances (Å) and angles (°) for **3**.

---

|                  |            |
|------------------|------------|
| Cd(1)-N(1)       | 2.318(4)   |
| Cd(1)-N(4)       | 2.253(3)   |
| Cd(1)-O(2)       | 2.233(3)   |
| Cd(1)-O(1W)      | 2.393(3)   |
| Cd(1)-O(3)       | 2.426(3)   |
| Cd(1)-O(4)       | 2.327(3)   |
| O(2)-Cd(1)-N(4)  | 114.05(12) |
| O(2)-Cd(1)-N(1)  | 83.48(11)  |
| N(4)-Cd(1)-N(1)  | 96.85(12)  |
| O(2)-Cd(1)-O(4)  | 100.28(11) |
| N(4)-Cd(1)-O(4)  | 145.39(11) |
| N(1)-Cd(1)-O(4)  | 90.98(11)  |
| O(2)-Cd(1)-O(1W) | 81.34(10)  |
| N(4)-Cd(1)-O(1W) | 90.69(12)  |
| N(1)-Cd(1)-O(1W) | 164.75(11) |
| O(4)-Cd(1)-O(1W) | 90.28(10)  |
| O(2)-Cd(1)-O(3)  | 153.00(11) |
| N(4)-Cd(1)-O(3)  | 90.33(11)  |
| N(1)-Cd(1)-O(3)  | 105.92(11) |
| O(4)-Cd(1)-O(3)  | 55.17(10)  |
| O(1W)-Cd(1)-O(3) | 87.21(10)  |

---

**Table S4.** Selected bond distances (Å) and angles (°) for **4**.

---

|              |          |
|--------------|----------|
| Cd(1)-N(3)   | 2.278(4) |
| Cd(1)-O(4)   | 2.415(3) |
| Cd(1)-O(6)   | 2.381(3) |
| Cd(1)-O(7)   | 2.276(3) |
| Cd(1)-OW1    | 2.339(3) |
| Cd(2)-N(1)   | 2.234(4) |
| Cd(2)-O(1)   | 2.311(3) |
| Cd(2)-O(8)#1 | 2.288(3) |
| Cd(2)-O(4)#2 | 2.318(3) |
| Cd(2)-O(5)#2 | 2.362(3) |
| Cd(2)-OW1#2  | 2.452(3) |

---



|                     |            |
|---------------------|------------|
| O(7)-Cd(1)-N(3)     | 90.21(14)  |
| O(7)-Cd(1)-OW1      | 133.13(11) |
| N(3)-Cd(1)-OW1      | 91.22(13)  |
| O(7)-Cd(1)-O(6)     | 101.70(12) |
| N(3)-Cd(1)-O(6)     | 93.66(14)  |
| OW1-Cd(1)-O(6)      | 124.92(11) |
| O(7)-Cd(1)-O(4)     | 110.91(12) |
| N(3)-Cd(1)-O(4)     | 158.86(13) |
| OW1-Cd(1)-O(4)      | 73.83(11)  |
| O(6)-Cd(1)-O(4)     | 83.32(12)  |
| N(1)-Cd(2)-O(8)#1   | 105.44(13) |
| N(1)-Cd(2)-O(1)     | 81.62(13)  |
| O(8)#1-Cd(2)-O(1)   | 92.10(13)  |
| N(1)-Cd(2)-O(4)#2   | 123.77(12) |
| O(8)#2-Cd(2)-O(4)#2 | 89.78(11)  |
| O(1)-Cd(2)-O(4)#2   | 152.91(12) |
| N(1)-Cd(2)-O(5)#2   | 94.63(13)  |
| O(8)#1-Cd(2)-O(5)#2 | 159.83(12) |
| O(1)-Cd(2)-O(5)#2   | 88.80(13)  |
| O(4)#2-Cd(2)-O(5)#2 | 80.51(12)  |
| N(1)-Cd(2)-OW1#2    | 158.29(12) |
| O(8)#1-Cd(2)-OW1#2  | 86.22(12)  |
| O(1)-Cd(2)-OW1#2    | 79.66(11)  |
| O(4)#2-Cd(2)-OW1#2  | 73.50(10)  |
| O(5)#2-Cd(2)-OW1#2  | 74.12(11)  |

---

Symmetry transformations used to generate equivalent atoms: #1 -x,-y,-z+1; #2 x+1,y,z.

**Table S5.** Selected bond distances (Å) and angles (°) for **5**.

---

|                   |            |
|-------------------|------------|
| Cd(1)-N(1)        | 2.271(3)   |
| Cd(1)-O(1)        | 2.3115(19) |
| Cd(1)-O(2)        | 2.413(2)   |
| Cd(2)-N(4)        | 2.264(2)   |
| Cd(2)-O(3)        | 2.357(3)   |
| Cd(2)-O(4)        | 2.309(3)   |
| N(1)-Cd(1)-N(1)#1 | 180.00(11) |
| N(1)-Cd(1)-O(1)   | 90.59(8)   |
| N(1)-Cd(1)-O(1)#1 | 89.41(8)   |
| O(1)-Cd(1)-O(1)#1 | 180.00(6)  |
| N(1)-Cd(1)-O(2)#1 | 88.65(9)   |
| O(1)-Cd(1)-O(2)#1 | 124.71(7)  |

|                   |            |
|-------------------|------------|
| N(1)-Cd(1)-O(2)   | 91.35(9)   |
| O(1)-Cd(1)-O(2)   | 55.29(7)   |
| O(2)#1-Cd(1)-O(2) | 180.00(12) |
| N(4)-Cd(2)-N(4)#2 | 90.66(13)  |
| N(4)-Cd(2)-O(4)   | 143.58(9)  |
| N(4)-Cd(2)-O(4)#2 | 98.94(11)  |
| O(4)-Cd(2)-O(4)#2 | 93.88(16)  |
| N(4)-Cd(2)-O(3)   | 89.38(9)   |
| O(4)-Cd(2)-O(3)   | 54.49(9)   |
| N(4)-Cd(2)-O(3)#2 | 99.36(11)  |
| O(4)-Cd(2)-O(3)#2 | 115.69(11) |
| O(3)-Cd(2)-O(3)#2 | 167.61(17) |

---

Symmetry transformations used to generate equivalent atoms: #1  $-x+2, -y+1, -z$ ; #2  $-x, y, -z-1/2$ .

**Table S6.** Selected bond distances (Å) and angles (°) for **6**.

---

|                      |            |
|----------------------|------------|
| Zn(1)-N(1)           | 1.984(3)   |
| Zn(1)-O(1)           | 1.961(3)   |
| Zn(1)-O(10)#2        | 1.941(3)   |
| Zn(1)-O(2)#1         | 1.975(3)   |
| Zn(2)-N(5)           | 2.008(3)   |
| Zn(2)-N(8)#3         | 2.024(3)   |
| Zn(2)-O(4)           | 1.956(3)   |
| Zn(2)-O(8)           | 1.952(3)   |
| O(10)#2-Zn(1)-O(1)   | 116.78(12) |
| O(10)#2-Zn(1)-O(2)#1 | 98.85(11)  |
| O(1)-Zn(1)-O(2)#1    | 117.15(12) |
| O(10)#2-Zn(1)-N(1)   | 116.93(14) |
| O(1)-Zn(1)-N(1)      | 98.94(13)  |
| O(2)#1-Zn(1)-N(1)    | 108.94(14) |
| O(8)-Zn(2)-O(4)      | 109.81(12) |
| O(8)-Zn(2)-N(5)      | 104.33(12) |
| O(4)-Zn(2)-N(5)      | 121.53(13) |
| O(8)-Zn(2)-N(8)#3    | 96.73(12)  |
| O(4)-Zn(2)-N(8)#3    | 112.55(12) |
| N(5)-Zn(2)-N(8)#3    | 108.73(13) |

---

Symmetry transformations used to generate equivalent atoms: #1  $-x+1, -y, -z+2$ ; #2  $-x+2, y+1/2, -z+5/2$ ; #3  $-x+1, y+1/2, -z+5/2$ .

**Table S7.** Selected bond distances (Å) and angles (°) for **7**.

---

|                     |            |
|---------------------|------------|
| Cd(1)-N(1)          | 2.270(3)   |
| Cd(1)-N(12)         | 2.270(3)   |
| Cd(1)-O(12)         | 2.309(3)   |
| Cd(1)-O(5)#3        | 2.223(3)   |
| Cd(1)-O(6)#2        | 2.349(3)   |
| Cd(2)-N(4)          | 2.274(3)   |
| Cd(2)-N(5)          | 2.333(4)   |
| Cd(2)-O(2)          | 2.227(3)   |
| Cd(2)-OW3           | 2.378(3)   |
| Cd(2)-O(8)#1        | 2.301(3)   |
| Cd(2)-O(7)#1        | 2.432(3)   |
| Cd(3)-N(8)          | 2.216(3)   |
| Cd(3)-N(9)          | 2.283(4)   |
| Cd(3)-O(3)#4        | 2.299(3)   |
| Cd(3)-O(4)#4        | 2.340(3)   |
| Cd(3)-O(9)          | 2.234(3)   |
| O(5)#3-Cd(1)-N(12)  | 85.26(12)  |
| O(5)#3-Cd(1)-N(1)   | 120.10(12) |
| N(12)-Cd(1)-N(1)    | 149.67(13) |
| O(5)#3-Cd(1)-O(12)  | 90.58(14)  |
| N(12)-Cd(1)-O(12)   | 108.14(13) |
| N(1)-Cd(1)-O(12)    | 89.26(13)  |
| O(5)#3-Cd(1)-O(6)#2 | 94.24(10)  |
| N(12)-Cd(1)-O(6)#2  | 83.60(11)  |
| N(1)-Cd(1)-O(6)#2   | 78.50(10)  |
| O(12)-Cd(1)-O(6)#2  | 167.67(12) |
| O(2)-Cd(2)-N(4)     | 92.58(12)  |
| O(2)-Cd(2)-O(8)#1   | 113.07(10) |
| N(4)-Cd(2)-O(8)#1   | 152.99(11) |
| O(2)-Cd(2)-N(5)     | 85.98(12)  |
| N(4)-Cd(2)-N(5)     | 104.72(13) |
| O(8)#1-Cd(2)-N(5)   | 86.15(12)  |
| O(2)-Cd(2)-OW3      | 89.95(10)  |
| N(4)-Cd(2)-OW3      | 85.74(11)  |
| O(8)#1-Cd(2)-OW3    | 85.97(10)  |
| N(5)-Cd(2)-OW3      | 168.92(11) |
| O(2)-Cd(2)-O(7)#1   | 166.41(10) |
| N(4)-Cd(2)-O(7)#1   | 100.00(11) |
| O(8)#1-Cd(2)-O(7)#1 | 55.49(9)   |
| N(5)-Cd(2)-O(7)#2   | 85.87(11)  |
| OW3-Cd(2)-O(7)#1    | 96.04(10)  |

|                     |            |
|---------------------|------------|
| N(8)-Cd(3)-O(9)     | 106.31(13) |
| N(8)-Cd(3)-N(9)     | 110.70(13) |
| O(9)-Cd(3)-N(9)     | 86.53(13)  |
| N(8)-Cd(3)-O(3)#4   | 150.38(12) |
| O(9)-Cd(3)-O(3)#4   | 97.37(12)  |
| N(9)-Cd(3)-O(3)#4   | 87.88(13)  |
| N(8)-Cd(3)-O(4)#4   | 94.49(12)  |
| O(9)-Cd(3)-O(4)#4   | 145.82(13) |
| N(9)-Cd(3)-O(4)#4   | 111.46(13) |
| O(3)#4-Cd(3)-O(4)#4 | 56.50(10)  |
| N(8)-Cd(3)-O(10)    | 86.64(12)  |
| O(9)-Cd(3)-O(10)    | 53.49(12)  |
| N(9)-Cd(3)-O(10)    | 139.89(12) |
| O(3)#4-Cd(3)-O(10)  | 93.62(12)  |
| O(4)#4-Cd(3)-O(10)  | 102.43(12) |

---

Symmetry transformations used to generate equivalent atoms: #1 -x,-y+1,-z+2; #2 -x-1,-y,-z+1; #3 x-1,y,z; #4 x-1,y+1,z.
